# Supplementary material for: Does the availability of snack foods in supermarkets vary internationally?
Source: PubMed Central journal article supplement (PMC3660266; doi:10.1186/1479-5868-10-56), 2013-05-14
Supplement: 1479-5868-10-56-S1.pdf [file 1479-5868-10-56-S1.pdf]

## Supermarket Snack Food Audit

1a) Auditor initials \_\_\_\_\_

1b) Date of audit \_\_\_\_\_

1c) Time of audit start \_\_\_\_\_

1d) Time of audit finish \_\_\_\_\_

1e) Supermarket chain: \_\_\_\_\_

1f) Consent gained

1g) Supermarket address \_\_\_\_\_



### 3) Supermarket layout audit – length of aisle and end of aisle displays

Please record the product at the front (near register) and back of each aisle, plus aisle length. (multiple items can be recorded)

| <b>Aisle Number</b><br>If aisle is split,<br>renumber as 1a,<br>1b, 2a, 2b, etc. | <b>Aisle length<br/>(m)</b><br>a) same as<br>previous | <b>Product: Front</b><br>a) reg soft drink<br>b) diet soft drink<br>c) chips<br>d) chocolate<br>e) confectionery<br>f) fruit/veg<br>g) non-snack item<br>h) no end-of-aisle display | <b>Product: Back</b><br>a) reg soft drink<br>b) diet soft drink<br>c) chips<br>d) chocolate<br>e) confectionery<br>f) fruit/veg<br>g) non-snack item<br>h) no end-of-aisle display |
|----------------------------------------------------------------------------------|-------------------------------------------------------|-------------------------------------------------------------------------------------------------------------------------------------------------------------------------------------|------------------------------------------------------------------------------------------------------------------------------------------------------------------------------------|
| 1                                                                                |                                                       |                                                                                                                                                                                     |                                                                                                                                                                                    |
| 2                                                                                |                                                       |                                                                                                                                                                                     |                                                                                                                                                                                    |
| 3                                                                                |                                                       |                                                                                                                                                                                     |                                                                                                                                                                                    |
| 4                                                                                |                                                       |                                                                                                                                                                                     |                                                                                                                                                                                    |
| 5                                                                                |                                                       |                                                                                                                                                                                     |                                                                                                                                                                                    |
| 6                                                                                |                                                       |                                                                                                                                                                                     |                                                                                                                                                                                    |
| 7                                                                                |                                                       |                                                                                                                                                                                     |                                                                                                                                                                                    |
| 8                                                                                |                                                       |                                                                                                                                                                                     |                                                                                                                                                                                    |
| 9                                                                                |                                                       |                                                                                                                                                                                     |                                                                                                                                                                                    |
| 10                                                                               |                                                       |                                                                                                                                                                                     |                                                                                                                                                                                    |
| 11                                                                               |                                                       |                                                                                                                                                                                     |                                                                                                                                                                                    |

If store is non-standard in terms of shape/ setup draw a picture below to help indicate how you measured store size (e.g. total store length x width) and which side of the aisle you considered as the front and the back of store (if the aisles run parallel with the checkouts).

| Aisle Number | Aisle length<br>(m)<br>a) same as previous<br>b) last aisle | Product: Front<br>a) reg soft drink<br>b) diet soft drink<br>c) chips<br>d) chocolate<br>e) confectionery<br>f) fruit/veg<br>g) non-snack item | Product: Back<br>a) reg soft drink<br>b) diet soft drink<br>c) chips<br>d) chocolate<br>e) confectionery<br>f) fruit/veg<br>g) non-snack item |
|--------------|-------------------------------------------------------------|------------------------------------------------------------------------------------------------------------------------------------------------|-----------------------------------------------------------------------------------------------------------------------------------------------|
| 12           |                                                             |                                                                                                                                                |                                                                                                                                               |
| 13           |                                                             |                                                                                                                                                |                                                                                                                                               |
| 14           |                                                             |                                                                                                                                                |                                                                                                                                               |
| 15           |                                                             |                                                                                                                                                |                                                                                                                                               |
| 16           |                                                             |                                                                                                                                                |                                                                                                                                               |
| 17           |                                                             |                                                                                                                                                |                                                                                                                                               |
| 18           |                                                             |                                                                                                                                                |                                                                                                                                               |
| 19           |                                                             |                                                                                                                                                |                                                                                                                                               |
| 20           |                                                             |                                                                                                                                                |                                                                                                                                               |
| 21           |                                                             |                                                                                                                                                |                                                                                                                                               |
| 22           |                                                             |                                                                                                                                                |                                                                                                                                               |
| 23           |                                                             |                                                                                                                                                |                                                                                                                                               |
| 24           |                                                             |                                                                                                                                                |                                                                                                                                               |

## 4) Shelf space

### 4a) Shelf space audit – soft drinks & mineral/soda water

Note: The following are **not** included in the definition of soft drinks or mineral/soda water for this survey: 1) sports drinks, 2) energy drinks, 3) vitamin water, 4) juices, 5) ciders, 6) cordial, 7) bottled still water

Total aisle length of soft drinks (m): \_\_\_\_\_

Total aisle length of natural mineral and soda water drinks (m): \_\_\_\_\_

### 4b) Shelf space audit – chips

Total aisle length of chips (m) (including multipacks): \_\_\_\_\_

Aisle length of multipack chips only (m): \_\_\_\_\_

### 4c) Shelf space audit – chocolate

Total aisle length of chocolate: \_\_\_\_\_

Total aisle length of confectionery: \_\_\_\_\_

## 5) Cash Register audit

Record the variety of products at each cash register display (multiple items can be recorded)

| <b>Cash register display</b> | <b>Product</b><br>a) reg soft drink<br>b) diet soft drink<br>c) chips<br>d) chocolate<br>e) confectionery<br>f) kids toys<br>g) no snack food |
|------------------------------|-----------------------------------------------------------------------------------------------------------------------------------------------|
| 1                            |                                                                                                                                               |
| 2                            |                                                                                                                                               |
| 3                            |                                                                                                                                               |
| 4                            |                                                                                                                                               |
| 5                            |                                                                                                                                               |
| 6                            |                                                                                                                                               |
| 7                            |                                                                                                                                               |
| 8                            |                                                                                                                                               |
| 9                            |                                                                                                                                               |
| 10                           |                                                                                                                                               |

| <b>Cash register display</b> | <b>Product</b><br>a) reg soft drink<br>b) diet soft drink<br>c) chips<br>d) chocolate<br>e) confectionery<br>f) kids toys<br>g) no snack food |
|------------------------------|-----------------------------------------------------------------------------------------------------------------------------------------------|
| 11                           |                                                                                                                                               |
| 12                           |                                                                                                                                               |
| 13                           |                                                                                                                                               |
| 14                           |                                                                                                                                               |
| 15                           |                                                                                                                                               |
| 16                           |                                                                                                                                               |
| 17                           |                                                                                                                                               |
| 18                           |                                                                                                                                               |
| 19                           |                                                                                                                                               |
| 20                           |                                                                                                                                               |

| <b>Cash register display</b> | <b>Product</b><br>a) reg soft drink<br>b) diet soft drink<br>c) chips<br>d) chocolate<br>e) confectionery<br>f) kids toys<br>g) no snack food |
|------------------------------|-----------------------------------------------------------------------------------------------------------------------------------------------|
| 21                           |                                                                                                                                               |
| 22                           |                                                                                                                                               |
| 23                           |                                                                                                                                               |
| 24                           |                                                                                                                                               |
| 25                           |                                                                                                                                               |
| 26                           |                                                                                                                                               |
| 27                           |                                                                                                                                               |
| 28                           |                                                                                                                                               |
| 29                           |                                                                                                                                               |
| 30                           |                                                                                                                                               |
